# Genetic and Mechanistic Evaluation for the Mixed-Field Agglutination in B<sub>3</sub> Blood Type with IVS3+5G>A ABO Gene Mutation

Ding-Ping Chen<sup>1,2,3</sup>, Ching-Ping Tseng<sup>2,3,9</sup>, Wei-Ting Wang<sup>1</sup>, Chien-Feng Sun<sup>1,4\*</sup>

**1** Department of Laboratory Medicine, Chang-Gung Memorial Hospital, Taoyuan County, Taiwan, **2** Department of Medical Biotechnology and Laboratory Science, Chang Gung University, Taoyuan County, Taiwan, **3** Molecular Medicine Research Center, Chang Gung University, Taoyuan County, Taiwan, **4** Department of Pathology, School of Medicine, Chang Gung University, Taoyuan County, Taiwan

## Abstract

**Background:** The ABO blood type B<sub>3</sub> is the most common B subtype in the Chinese population with a frequency of 1/900. Although IVS3+5G>A (rs55852701) mutation of B gene has been shown to associate with the development of B<sub>3</sub> blood type, genetic and mechanistic evaluation for the unique mixed-field agglutination phenotype has not yet been completely addressed.

**Methodology/Principal Findings:** In this study, we analyzed 16 cases of confirmed B<sub>3</sub> individuals and found that IVS3+5G>A attributes to all cases of B<sub>3</sub>. RT-PCR analyses revealed the presence of at least 7 types of aberrant B<sub>3</sub> splicing transcripts with most of the transcripts causing early termination and producing non-functional protein during translation. The splicing transcript without exon 3 that was predicted to generate functional B<sub>3</sub> glycosyltransferase lacking 19 amino acids at the N-terminal segment constituted only 0.9% of the splicing transcripts. Expression of the B<sub>3</sub> cDNA with exon 3 deletion in the K562 erythroleukemia cells revealed that the B<sub>3</sub> glycosyltransferase had only 40% of B<sub>1</sub> activity in converting H antigen to B antigen. Notably, the typical mixed-field agglutination of B<sub>3</sub>-RBCs can be mimicked by adding anti-B antibody to the K562-B<sub>3</sub> cells.

**Conclusions/Significance:** This study thereby demonstrates that both aberrant splicing of B transcripts and the reduced B<sub>3</sub> glycosyltransferase activity contribute to weak B expression and the mixed-field agglutination of B<sub>3</sub>, adding to the complexity for the regulatory mechanisms of ABO gene expression.

**Citation:** Chen D-P, Tseng C-P, Wang W-T, Sun C-F (2012) Genetic and Mechanistic Evaluation for the Mixed-Field Agglutination in B<sub>3</sub> Blood Type with IVS3+5G>A ABO Gene Mutation. PLoS ONE 7(5): e37272. doi:10.1371/journal.pone.0037272

**Editor:** Kathleen Freson, University of Leuven, Belgium

**Received:** December 5, 2011; **Accepted:** April 17, 2012; **Published:** May 18, 2012

**Copyright:** © 2012 Chen et al. This is an open-access article distributed under the terms of the Creative Commons Attribution License, which permits unrestricted use, distribution, and reproduction in any medium, provided the original author and source are credited.

**Funding:** This work was supported by the Grant NSC 98-2320-B-182A-006 from the National Science Council, Taiwan. The funders had no role in study design, data collection and analysis, decision to publish, or preparation of the manuscript.

**Competing Interests:** The authors have declared that no competing interests exist.

\* E-mail: [suncgj@adm.cgmh.org.tw](mailto:suncgj@adm.cgmh.org.tw)

<sup>9</sup> These authors contributed equally to this work.

## Introduction

ABO is the most important blood group system in transfusion medicine [1]. A specific glycosyltransferase encoded by the *ABO* gene plays an important role in the modification of ABO blood antigen [2,3]. The *ABO* locus spans over 18 kilobases (kb) and consists of 7 exons which range in size from 26 to 688 base pairs. Most of the coding sequences lie in exons 6 and 7 [4]. Of the common *ABO* alleles, at least two *A* alleles, one *B* allele and two *O* alleles have been reported [5]. For the *A* alleles, the sequence of *A*<sup>I</sup> is the same as the cDNA clone FY-66-1, while *A*<sup>Iv</sup> has a single nucleotide (nt) substitution at position 467 (C to T) that leads to the substitution of proline to leucine. For the *B* allele, the sequences differ from *A* allele in 7 positions at nt 297, 526, 657, 703, 796, 803 and 930. For the alleles *O*<sup>I</sup> and *O*<sup>Iv</sup>, they share a single nt deletion (G) at position 261 that results in reading frame shift leading to the appearance of a stop codon at the positions 353–355. However,

there are five different nt positions between *O*<sup>I</sup> and *O*<sup>Iv</sup> alleles at 297, 646, 681, 771 and 829, respectively.

In addition to the common ABO blood types, distinct blood types with weak expression of A or B antigens on red blood cells (RBCs) have been identified and are designated as A<sub>3</sub>, A<sub>x</sub>, A<sub>el</sub>, B<sub>3</sub>, B<sub>x</sub>, B<sub>el</sub>, cis-AB and B(A), respectively [6,7]. Most of the *A* and *B* sub-alleles responsible for the formation of subgroups have been identified [8–12]. Some of these minor alleles have mutation(s) in the coding sequences of *ABO* gene and most of the mutations are single nt substitution leading to an amino acid alteration. Defect in RNA splicing also accounts for the occurrence of a number of blood types. In the case of B<sub>3</sub> with typical mixed-field agglutination of RBCs in the presence of anti-B or anti-AB antibody, a number of genetic alternations have been reported. In Japan, Yamamoto *et al.* reported a B<sub>3</sub> case with a 1054C>T substitution nears the 3'-end of the *B* allele [13]. Ogasawara *et al.* identified a B<sub>3</sub> case that is generated through gene conversion mechanism around the nt 646 leading to a 646T>A substitution and lack of B

specific polymorphism at nt 657 [14]. In Taiwan, B<sub>3</sub> individuals have been shown to carry a B allele with a G>A mutation at the +5 nucleotide of intron 3 (rs55852701) [15]. Such mutation destroys the consensus of the splice donor site and causes splicing error leading to exon 3 skipping during mRNA splicing. The B<sub>3</sub> transcript without exon 3 predicts a B glycosyltransferase that lacks 19 amino acids at the N-terminal segment. The frequency of B<sub>3</sub> among group AB Chinese persons are approximately 1 in 900 [16]. Although B<sub>3</sub> is the most common B subtype in the Chinese population, only two articles have been published to address the molecular and genetic basis of B<sub>3</sub> [15,17]. The mechanism responsible for the mixed-field agglutination of B<sub>3</sub> RBCs still awaits to elucidate.

In this study, we comprehensively analyze the splicing transcripts isolated from B<sub>3</sub> individuals in the Taiwanese population. Notably, we found that the splicing transcripts with only exon 3 deletion are rare. Many of the splicing variants result in reading frame shift and generate non-functional B glycosyltransferase. Through the use of K562 cell study model, we report the first experimental evidence that the IVS3+5G>A mutation alone, independent of the promoter and enhancer activity, is sufficient to produce the typical mixed-field agglutination in the presence of anti-B antibody. The significances of these findings are discussed.

## Results

### IVS3+5G>A is a common B gene mutation in the B<sub>3</sub> subtype of Taiwanese population

Previous studies indicate that B<sub>3</sub> individuals in the Taiwanese population carry the IVS3+5G>A mutation of B allele [15]. To determine whether IVS3+5G>A is common to B<sub>3</sub>, DNA samples from 16 B<sub>3</sub> individuals were subject to PCR amplification using the primer pairs ABOF303 and B3R120 (Table 1). DNA sequencing revealed that IVS3+5G>A of B allele was present in all of the 16 DNA samples (Fig. 1). Our data therefore confirm previous report by Yu *et al.* and recognize IVS3+5G>A of B allele

**Table 1.** The primer sequences for generating various ABO alleles cDNA.

| Name         | Sequence                             |
|--------------|--------------------------------------|
| ABOF303      | 5'-caaatgccacgcactctcgacctatgatcc-3' |
| B3R120       | 5'-cagagttgagcatgtctcac-3'           |
| cDNA1-F      | 5'-aaggcggaggccgagaccagacg-3'        |
| cDNA1-R      | 5'-cctaggcttcagttactcacaac-3'        |
| cDNA2-F      | 5'-gaattcagccatggccgaggtgtgc-3'      |
| cDNA2-R      | 5'-tctagaacaacaggcggacaaggaacag-3'   |
| ABO exon2-4F | 5'-cttggtctgtttggcaggtgcttaggga-3'   |
| ABO exon2-4R | 5'-tcctcaacagccatgccaaacaagacgaag-3' |

doi:10.1371/journal.pone.0037272.t001

as a common mutation for all B<sub>3</sub> cases in the Taiwanese population.

### Aberrant splicing transcripts generated by B<sub>3</sub> genetic mutation

According to the theory of RNA splicing, IVS3+5G>A mutation of B allele is predicted to cause splicing error and generates a B<sub>3</sub> transcript without exon 3. However, when attempting to isolate full-length B<sub>3</sub> transcripts from the peripheral blood of B<sub>3</sub> individuals, at least two major bands with the sizes of 800–900 bp were observed during agarose gel electrophoresis of the RT-PCR products. In contrast, only one major band at approximate 1300 bp was obtained when total RNA from the peripheral blood of B<sub>1</sub> individual was used (Fig. 2). These data implicate that alternative splicing of B<sub>3</sub> transcript is likely to occur in a more sophisticated way other than splicing out of exon 3 only.

To unveil the splicing variants in B<sub>3</sub>, we cloned the PCR products from B<sub>3</sub> into Zero Blunt II TOPO vector and randomly sequenced 102 independent clones to identify the splicing types

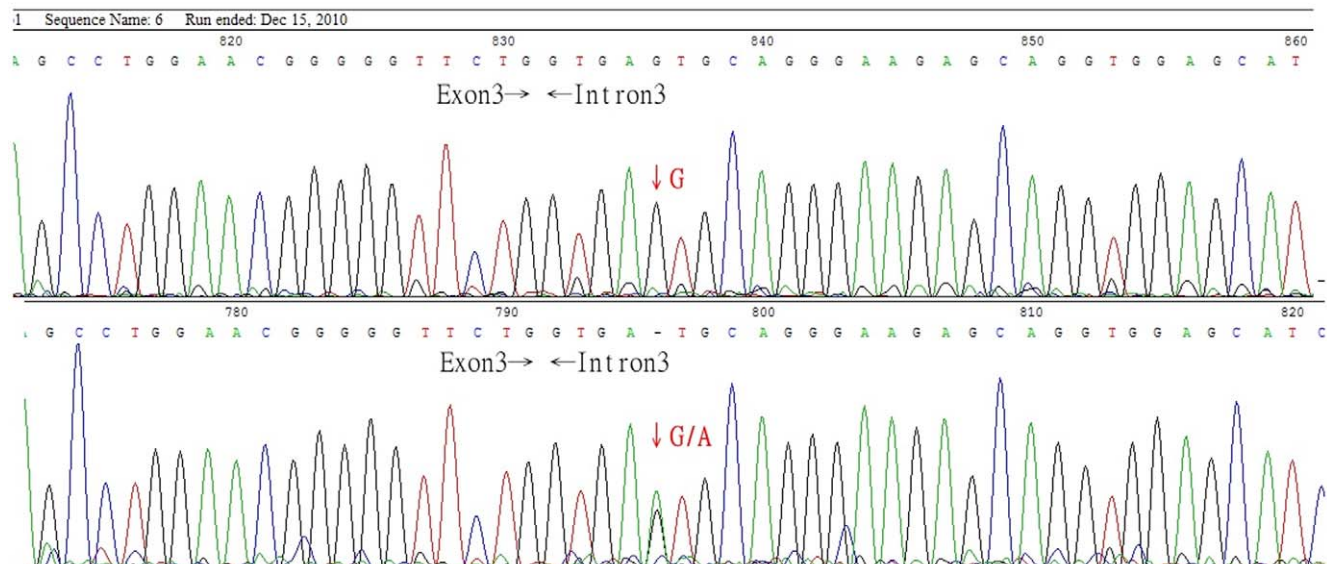

**Figure 1.** The DNA sequences at the boundary of exon 3-intron 3 in blood type B and B<sub>3</sub>. The DNA sequences between exon 3 and intron 3 in blood type B (upper panel) and B<sub>3</sub> (lower panel) case. The B<sub>3</sub> individuals have been shown to carry a B allele with a G>A mutation at the +5 nucleotide of intron 3.

doi:10.1371/journal.pone.0037272.g001

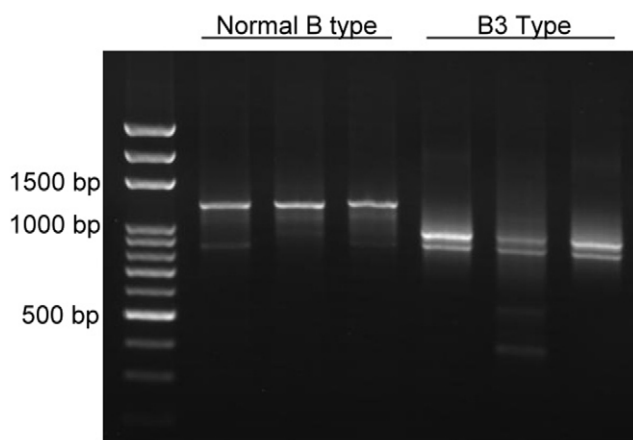

**Figure 2. RT-PCR of B<sub>1</sub> and B<sub>3</sub> transcripts.** Buffy coat from the peripheral blood of B<sub>1</sub> (n=3) and B<sub>3</sub> (n=3) cases were subject to total RNA isolation. RT-PCR was then performed to obtain B<sub>1</sub> and B<sub>3</sub> full-length cDNA using the primer pair ABOF303 and B3R120. The PCR products were analyzed by agarose gel electrophoresis analysis. doi:10.1371/journal.pone.0037272.g002

(Table 2 and Fig. S1 and S2). Our data revealed that at least 7 types of splicing transcripts were obtained from B<sub>3</sub> individuals. Exon 2/3/6 deletion represented the most abundant splicing variants with a frequency of 68.6%. In addition, exon 2/3/6 deletion along with intron 6 insertion was the second most abundant splicing variants with a frequency of 11.8%. The frequency of exon 2/3 deletion, exon 2/3/4/5/6 deletion, exon 6 deletion, and exon 2/3/4/6 deletion was 8.8%, 6.7%, 1.0%, and 1.0%, respectively. All these splicing variants resulted in frame shift mutation and produced truncated protein without transferase activity. Notably, only one clone carried the splicing variant with exon 3 deletion that was predicted to generate a truncated but functional transferase (Fig. S2). Our data therefore indicate that aberrant splicing of B allele is common in B<sub>3</sub> cases and the transcript with exon 3 deletion only was rare with the frequency less than 1%.

### B<sub>3</sub> affects surface B antigen expression

Various molecular mechanisms including mutations at the promoter, enhancer and coding sequences have been proposed to associate with phenotypic changes for a number of blood types [18–21]. We previously used K562 cells as a cell study model to express B<sup>I</sup> cDNA and to investigate ABO antigen expression [22]. Hence, we used the same strategy to stably expressed B<sup>3</sup> cDNA

under the control of cytomegalovirus promoter and determine the effect of B gene exon 3 deletion on surface B antigen expression.

To compare the levels of antigen expression, the stable lines expressing B<sup>I</sup> or B<sup>3</sup> cDNA were treated with sodium butyrate to induce erythroid differentiation and surface expression of B antigen was measured by the binding of FITC-conjugated lectin from *Bandeiraea simplicifolia* (BS-I Isolectin B4) followed by flow cytometry analysis. As shown in Fig. 3, the parental K562 cells and the cells transfected with control vector did not express B antigen. In contrast, B antigen expression was increased in the stable cell line expressing B<sup>I</sup> or B<sup>3</sup> cDNA. The relative percentage of B antigen expressing cells were determined for comparing the levels of B antigen expression in the B<sub>1</sub> and B<sub>3</sub> sublines (Table 3). The parental K562 cells that did not express B antigen were used as the negative control whereas the stable cell line expressing B<sup>I</sup> cDNA was served as a positive control with the percentage of antigen expressing cells for B<sub>1</sub> setting as 100%. Accordingly, the relative percentage of B antigen expression for the cells of B<sub>3</sub> was 40.92% of B<sub>1</sub>. To further delineate the expression levels of B antigen in the B<sub>1</sub> and B<sub>3</sub> sublines, the MFI that represents the total B antigen expression was also compared. We found that the MFI for B<sub>3</sub> was lower than B<sub>1</sub> (Table 3). These data thereby demonstrate that exon 3 deletion of B allele causes a decrease in surface B antigen expression.

### Expression of B<sub>3</sub> protein is sufficient to produce mixed-field agglutination phenotype

Mixed-field agglutination is a typical B<sub>3</sub> phenotype when reacted with the anti-B antibody. To determine whether expression of exon 3 deletion B<sub>3</sub> protein alone is sufficient to cause mixed-field agglutination, K562-B<sub>3</sub> and the control K562 and K562-B<sub>1</sub> cells were incubated with the anti-B antibody, respectively (Fig. 4A). No agglutination was observed for the control K562 cells. In contrast, large agglutination appeared when K562-B<sub>1</sub> was reacted with the anti-B antibody. Notably, moderate and small size of agglutination that was similar to the characteristic mixed-field agglutination of B<sub>3</sub> was observed when K562-B<sub>3</sub> was reacted with the anti-B antibody. Quantitative analysis for the size of agglutination further revealed that K562-B<sub>3</sub> distributed mainly between 5–10 cells/aggregate (Fig. 4B). Large aggregates with more than 30 cells were only observed for K562-B<sub>1</sub>. These data thereby indicate that expression of exon 3 deletion B<sub>3</sub> protein is sufficient to produce the mixed-field agglutination phenotype.

### Discussion

B<sub>3</sub> is a rare blood type that is characterized by mixed-field agglutination of RBCs when reacts with anti-B antibody. In this study, we confirm previous report and identify IVS3+5G>A as the common B<sub>3</sub> mutation in the Taiwanese population. This mutation causes splicing error and generates mostly non-functional B transcripts. In contrast, the exon 3 deletion transcript that is predicted to generate truncated but functional B transferase accounts for less than 1% of the splicing transcripts in B<sub>3</sub> individuals. The B<sub>3</sub> transferase is demonstrated to elicit half of the normal B<sub>1</sub> activity as revealed by our cell study model analysis. Notably, expression of the exon 3 deletion transcript alone is sufficient to generate mixed-field agglutination in the presence of anti-B antibody. This study thereby provides the first direct evidence for the underlying mechanism of mixed-field agglutination in B<sub>3</sub> blood type.

Precise pre-mRNA splicing is catalyzed by the spliceosome that recognizes conserved sequences at the exon-intron boundaries and branch point sites [19]. The 5' splicing site (5'ss) is composed of

**Table 2.** The frequency for the alternative splicing types.

| cDNA type                                | Times of clone |
|------------------------------------------|----------------|
| Exon 2, 3, 6 deletion                    | 70             |
| Exon 2, 3, 6 deletion+Intron 6 insertion | 12             |
| Exon 2, 3 deletion                       | 9              |
| Exon 2, 3, 4, 5, 6 deletion              | 7              |
| Exon 6 deletion                          | 1              |
| Exon 2, 3, 4, 6 deletion                 | 1              |
| Exon 3 deletion                          | 1              |
| Total                                    | 102            |

doi:10.1371/journal.pone.0037272.t002

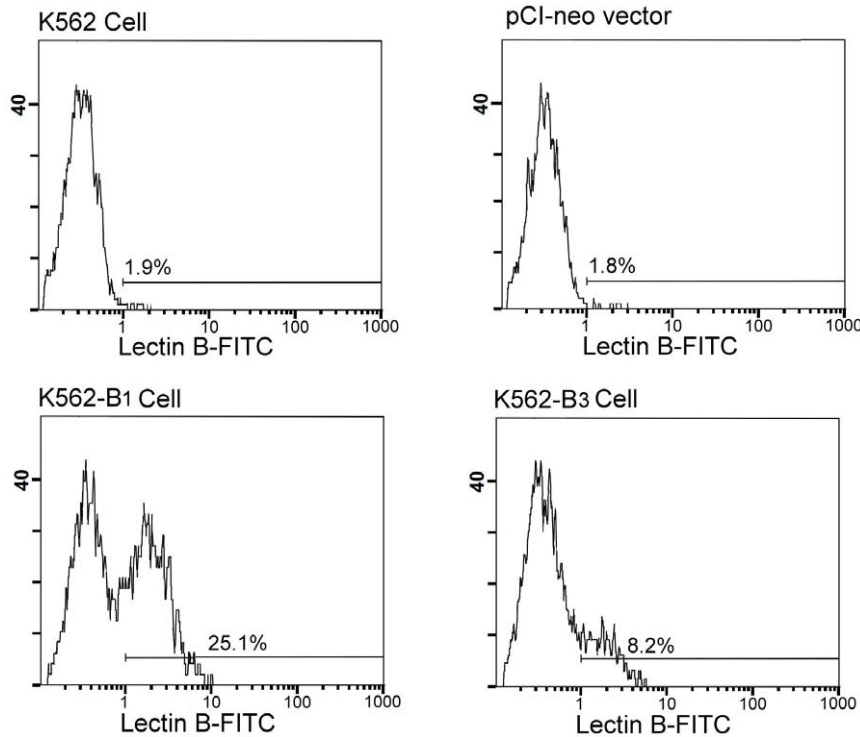

**Figure 3. Flow cytometric analysis of B antigen expression.** The indicated cell lines were treated with sodium butyrate for 48 h to induce erythroid differentiation. The cells were then incubated with FITC-conjugated BS-I Isolectin B4 from *Bandeiraea simplicifolia*. Flow cytometric analyses were then performed to determine the levels of surface B antigen expression. Representative histograms for the indicated sublines were shown. The FITC-derived fluorescent intensity was displayed on the x-axis on a logarithmic scale and the number of cells on the y-axis.  
doi:10.1371/journal.pone.0037272.g003

nine partially conserved nucleotides at the exon-intron boundary, and base pairing to the 5'-terminus of U1 snRNA occurs in this complex [20]. B<sub>3</sub> was first reported by Yu *et al.* as an intronic mutation at the +5 nucleotide of 5' splicing site in intron 3. Similar to B<sub>3</sub>, the A<sub>el</sub> phenotype was found to possess an IVS6+5G>A mutation among Taiwanese and result in weak A [11]. Hence, single nucleotide substitution of the cis-element in pre-mRNA splicing machinery not only associate with the development of various diseases and genetic disorders [23–25], but also accounts for the genetic changes associated with ABO blood subtypes.

By analyzing the RNA from B<sub>3</sub> cases, two different transcripts corresponding to exon 2-exon 7 with skipping of exon 3 (502 bp) and the same structure without the exon 3 and exon 6 regions (367 bp) were previously identified [15]. In this study, we performed RT-PCR and cloned full-length B transcripts from B<sub>3</sub> individuals to comprehensively analyze the types of splicing transcripts and their relative abundance. Two major findings are

noticed during the analysis. At first, the complexity for the splicing transcripts is remarkable and exceeds our expectation. At least 7 different splicing transcripts were identified. Most of these transcripts have exon 3 deletion (101/102), exon 6 deletion (92/102) and exon 3/exon 6 deletion (102/102). Exon 2 deletion that has not been reported previously also contributes a major portion of the splicing transcripts (100/102). The large number of cryptic splicing types occurs in the B<sub>3</sub> individuals implicates the importance of +5 nucleotide in the 5' splicing site of intron 3 that is essential for appropriate splicing and generating functional ABO protein.

Secondly, the 7 types of splicing transcripts we identify in this study are present in B<sub>3</sub> individuals with different ratio. The exon 2, 3 and 6 deletion (70/102), exon 2, 3, 6 deletion plus intron 6 insertion (12/102), and exon 2 and 3 deletion (9/102) are the three major splicing variants. Due to frameshift and early termination, these three major splicing variants are not predicted to produce

**Table 3.** The B antigen expression for B and B<sub>3</sub> subtypes.

| Expression constructs | Phenotype | ISBT number | Relative % antigen expressing cells <sup>a</sup> | MFI <sup>a</sup> |
|-----------------------|-----------|-------------|--------------------------------------------------|------------------|
| K562                  | O         |             | 0                                                | -                |
| B1                    | B1        | B101        | 100                                              | 3431 ± 1530      |
| B3 (intron 3+5G>A)    | B3        | B303        | 40.92 ± 11.78*                                   | 1831 ± 873*      |

<sup>a</sup>The data represent the mean ± S.D. (n = 10) for the indicated transfectants. The mean percentage of B antigen-expressing cells obtained from B101 was used as references and was defined as 100%.

\*Student t-test was used for statistically analysis with  $p < 0.01$  when compared with B101.

doi:10.1371/journal.pone.0037272.t003

A.

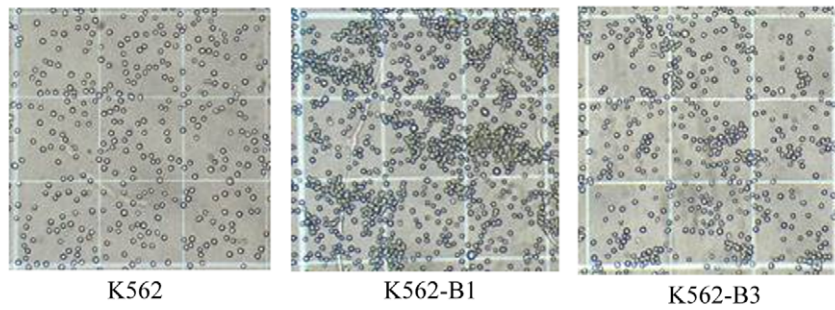

B.

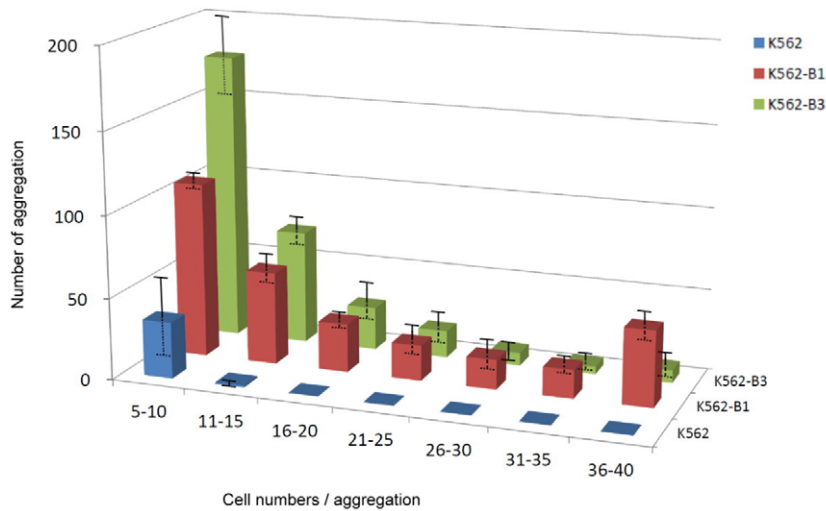

**Figure 4. Expression of B<sub>3</sub> cDNA is sufficient to induce typical mixed-field agglutination.** A. The indicated K562 sublines were treated with sodium butyrate to induce erythroid differentiation. The cells were then incubated with anti-B antibody and cell agglutination was observed using a phase contrast microscope. B. The numbers of aggregation with the indicated number of cells/aggregate were counted. Histogram for the agglutination size distribution was shown. The data represent the mean  $\pm$  S.D. of three independent experiments.  $P < 0.001$  by Kruskal-Wallis test. doi:10.1371/journal.pone.0037272.g004

functional B glycosyltransferase. In contrast, the transcripts with exon 3 deletion were barely present in B<sub>3</sub> individual (1/102). Similar to our findings, Huang *et al.* reported a CYP17A1 mutation IVS1+2T>C is associated with 17 $\alpha$ -hydroxylase deficiency [26]. When the full-length CYP17A1 minigene containing the intronic mutation was expressed in transfected cells, the majority (>90%) of mRNA transcripts were incorrectly spliced. The IVS1+2T>C mutation therefore abolishes most 17 $\alpha$ -hydroxylase/17, 20-lyase enzyme activity by aberrant mRNA splicing to an intronic pseudo-exon, causing a frame shift and early termination. Hence, the rare representation of exon 3 deletion B transcript is likely to associate with the decrease in B glycosyltransferase activity for B<sub>3</sub> individuals.

At the protein level, the B<sub>3</sub> transcript with exon 3 deletion is predicted to encode a protein with 336 amino acids. According to the crystal structure of B glycosyltransferase, the protein sequences corresponding to exon 3 are located at the transmembrane and mainly the stem region (Fig. 5). The stem region serves as a flexible tether, allowing the catalytic domain to glycosylate carbohydrate

groups of membrane bound H determinants [3,27,28]. Hence, the lack of exon 3 likely produces B<sub>3</sub> protein that is unstable and causes a decrease in B<sub>3</sub> protein expression. It is also likely that, due to the short stem region, B<sub>3</sub> protein is less flexible and can not efficiently transfer 1,3-D-galactose to the H protein (Fig. 5). All these effects can result in reduced B antigen expression on the cell surface of RBC. Indeed, when B<sub>3</sub> cDNA was expressed in the K562 cell study model, B<sub>3</sub> has only 50% of B<sub>1</sub> activity in processing surface B antigen expression that provides a molecular basis for the decrease in B antigen expression for B<sub>3</sub> individuals.

One of the hallmarks of B<sub>3</sub> is the mixed-field agglutination reaction when B<sub>3</sub> RBCs are incubated with the anti-B antibody. This phenomenon appears to correlate with the weak B antigen expression on the surface of B<sub>3</sub> RBCs. Several genetic factors including base insertions, deletions and substitutions mainly in exon 6 and 7 [8,29], hybrid alleles [30], splice-site mutations [15,31], variations in enhancer activity [18–20], promoter methylation [32], promoter mutations [33] and alternative promoter regions [21] possess the potential to influence A and B

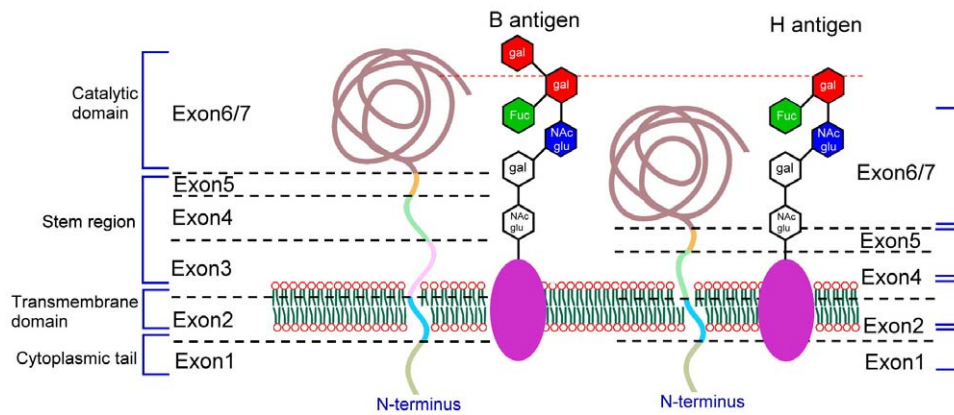

**Figure 5. Schematic representation of the B<sub>3</sub> transferase structure and its interaction with galactose residues.** The schematic representation of the B glycosyltransferases is based on previous studies [3,27]. The relative location of the ABO transferase for the cytoplasmic tail, transmembrane domain, stem region, catalytic domain and the galactose residues are shown. The exons 1 to 7 of the ABO gene encoding for the different parts of the B glycosyltransferases are indicated. The B glycosyltransferases catalyze the final step of B antigen synthesis by transferring 1,3-D-galactose residues onto H determinants as the specific acceptor glycoconjugates. As to B<sub>3</sub>, the lack of exon 3 corresponding to the transmembrane and stem region of B glycosyltransferase likely produces B<sub>3</sub> protein that is unstable and causes a decrease in B<sub>3</sub> protein expression. It is also likely that, due to the short stem region, B<sub>3</sub> protein is less flexible and can not efficiently transfer 1,3-D-galactose to the H protein. doi:10.1371/journal.pone.0037272.g005

glycosyltransferase activity. In this study, we found that mixed-field agglutination can be replicated simply by incubating B<sub>3</sub>-expressing K562 cells with anti-B antibody, indicating that the B<sub>3</sub> protein alone is sufficient to cause the unique mixed-field agglutination.

Hence, we propose two inter-relative mechanisms that cause a decrease in B surface antigen expression and ultimately mixed-field agglutination phenotype of B<sub>3</sub>. At first, IVS3+5G>A mutation of B gene causes cryptic splicing error and produces at least 7 alternative splicing types. More than 99% of the splicing transcripts do not produce functional protein and less than 1% of the splicing transcripts with exon 3 deletion are predicted to generate functional B<sub>3</sub> protein. Furthermore, B<sub>3</sub> protein has only about half of the normal B function. These two interactive mechanisms together account for the weak B antigen expression and ultimately cause the typical mixed-field agglutination of B<sub>3</sub>. This study thereby shed new insight for the genetic and mechanistic effects of IVS3+5G>A on the mixed-field agglutination phenotype associated with B<sub>3</sub>.

Mixed-field phenomenon is usually an indicator of B<sub>3</sub> blood type when the anti-B or anti-AB antibody was used in the agglutination test. Although it is known that B<sub>3</sub> individuals in Taiwan carry the B allele with a G>A mutation at the +5 nucleotide of intron 3, there is still lack of evidence to demonstrate that B<sub>3</sub> phenotype is caused by IVS3+5G>A mutation. On the other hand, it is also likely that B<sub>3</sub> blood type is associated with other genetic changes as reported previously [13–17]. The cell study model we reported herein offers a way to confirm whether a particular ABO gene mutation contributes to the indicated blood phenotype. This approach is also applicable in the analysis of other blood types and is thereby important in transfusion medicine.

## Materials and Methods

### Materials

Human leukemic K562 cells with homozygous O alleles and surface expression of type H antigens were obtained from American Type Culture Collection (Manassas, VA). The QIAamp RNA Blood Mini Kit was purchased from Qiagen (Valencia, CA). The SuperScript III First-Strand Synthesis System, Zero Blunt TOPO PCR Cloning kit and Lipofectamine 2000 (LF2000) were

purchased from Invitrogen (Carlsbad, CA). The pCI-neo mammalian expression vector was purchased from Promega (Madison, USA). The sodium butyrate and FITC-conjugated lectin from *Bandeiraea simplicifolia* (BS-I Isolectin B<sub>4</sub>) were purchased from Sigma (Saint Louis, MO).

### Collection of blood specimen from B<sub>3</sub> individuals

Typing of ABO blood type was performed by the standard haemagglutination test. The peripheral blood in K<sub>3</sub>-EDTA tubes was obtained from healthy volunteers as control groups with written informed consent according to the ethical requirements and regulations of the Chang Gung Memorial Hospital Institute Review Board, who approved this study. As to the 16 B<sub>3</sub> individuals, the specimens were not individually identified after de-linked process and were analyzed anonymously with the approval of Chang Gung Memorial Hospital Institute Review Board.

### Genomic DNA isolation and PCR

Genomic DNAs of B<sub>3</sub> individuals were prepared from their peripheral blood cells using the QIAamp DNA Blood Mini Kit (Qiagen GmbH, Hilden, Germany). To determine whether the B allele has a G>A mutation at the +5 nucleotide of intron 3, polymerase chain reaction (PCR) was used to amplify the 986 bps DNA fragment of ABO gene encompassing the region from exon 2 through intron 3 [15]. Briefly, PCR was set up in a reaction volume of 50 µl containing 1X reaction buffer, 10 nmol of dNTP, 6 pmol of forward and reverse primers (ABOF303 and B3R120, Table 1), 300 ng of genomic DNA, and 1 µl of *Pfu Turbo*<sup>®</sup> Hotstart DNA Polymerase (Stratagene). The cycling condition was 4 min at 94°C for 1 cycle, 30 sec at 94°C, 30 sec at 58°C, and 45 sec at 72°C for 30 cycles, and 10 min at 72°C for 1 cycle. Subsequently, 5 µl of PCR products were fractionated on the 2% agarose gel and visualized by ethidium bromide staining. The remaining PCR product was used to carry out direct sequencing using the Big Dye Terminator Cycle Sequencing kit (Applied Biosystems, Foster City, CA) and an ABI PRISM 3100 Genetic Analyzer (Applied Biosystems, Foster City, CA) according to the manufacturer's instruction.

### RT-PCR and plasmid construction

Total RNAs were extracted from 1 ml of peripheral blood by QIAamp RNA Blood Mini Kit. Reverse transcription (RT) into complementary DNA (cDNA) was performed using the SuperScript III First-Strand Synthesis System and the oligo (dT)-15 primers. Briefly, the total RNA (5 µg) was subjected to RT reaction (20 µl) containing 2 µl of 10X RT buffer, 2 µl of 0.1 M dithiothreitol, 1 µl of 10 mM dNTP, 1 µl of 50 µM poly(dT) primer, 1 µl of 40 U/µl RNaseOUT and 1 µl of 200 U/µl SuperScript III reverse transcriptase. The RT condition was 50°C for 50 min and 85°C for 5 min followed by incubation with 1 µl of RNase H for 20 min at 37°C. The RT mixtures were then subject to PCR in a reaction (50 µl) containing 5 µl of RT product, 5 µl of 10X PCR buffer (20 mM MgCl<sub>2</sub>), 4 µl of 2.5 mM dNTP, 2 µl of 10 µM cDNA1-F and cDNA1-R primers (Table 1), and 1 µl of *Pfu Turbo*<sup>®</sup> Hotstart DNA Polymerase (Stratagene). The cycling condition was 3 min at 95°C for 1 cycle, 30 sec at 94°C, 30 sec at 65°C, and 1 min at 72°C for 35 cycles, and 10 min at 72°C for 1 cycle. The PCR product was cloned into the pCR4Blunt-TOPO vector by the Zero Blunt TOPO PCR Cloning kit. The sequences of the PCR insert were determined using the BigDye<sup>®</sup> Terminator v3.1 Cycle Sequencing Kit.

### Site-directed mutagenesis

The B<sup>3</sup> cDNA was generated by site-directed mutagenesis. Briefly, B101 cDNA was used as the template to generate two PCR products. At first, a 118 bp DNA fragment of exon 1–4 without exon 3 was amplified by the primer pair cDNA2-F and exon2-4R (Table 1). Then a 975 bp DNA fragment of exon 2–7 skipping exon 3 was obtained by PCR using the primers exon2-4F and cDNA2-R. The HotStart pfu DNA polymerase was used for PCR amplification of cDNA fragments at the cycling condition of 4 min at 94°C for 1 cycle, 30 sec at 94°C, 30 sec at 58°C, and 45 sec at 72°C for 30 cycles, and 10 min at 72°C for 1 cycle. After purification with QIAquick PCR Purification kit (QIAGEN), the 118 bp and 975 bp PCR products were mixed and the second PCR was performed using the primers cDNA2-F and cDNA2-R in the same cycling condition to obtain the B<sup>3</sup> cDNA with exon 3 deletion (1134 bp). The 1134 bp PCR product was cloned into the pCRII-TOPO vector by a Zero Blunt TOPO PCR Cloning kit and the sequences were confirmed by DNA sequencing. The inserted plasmid DNA was subsequently digested with *Eco* RI and *Xba* I and inserted into the pCI-neo mammalian expression vector. All constructs were validated by DNA sequencing analysis.

### Stable transfection

The K562 cells (1 × 10<sup>6</sup>) were routinely cultured in 90% Roswell Park Memorial Institute (RPMI) 1640 medium supplemented with 10% fetal bovine serum, penicillin (50 U/mL) and streptomycin (50 µg/mL), and were transfected with 5 µg of plasmid DNA using LF2000 according to the manufacturer's instructions. The stable clones were selected by antibiotic resistance in the growth medium containing 400 µg/mL of G418 for 2 weeks. The transfectants (3 × 10<sup>5</sup>) were stimulated by sodium butyrate to induce erythroid differentiation. Forty-eight h later, the cells were harvested and subject to flow cytometry to analyze B and B<sub>3</sub> antigen expression.

### Flow cytometry analysis

For B antigen detection, K562 cells or the transfectants (3 × 10<sup>5</sup>) were washed twice with 1X phosphate-buffered saline (PBS) and

were incubated for 60 min at room temperature with FITC-conjugated lectin from *Bandeiraea simplicifolia* (BS-I Isolectin B4). After two washes with 1X PBS, the cells were analyzed on a flow cytometer (FACSscan). Two variables, the percentage of antigen-expressing cells and the mean fluorescence intensity (MFI), were used for data analysis. MFI is a relative measurement for the amount of antigen expression on the cell surface. The parental K562 cells were used as a reference control.

### Mixed-field agglutination assay

The K562-B<sub>3</sub> and K562 control cells (3 × 10<sup>5</sup>) were stimulated by sodium butyrate to induce erythroid differentiation. Forty-eight h later, the cells were adjusted to 5 × 10<sup>6</sup>/ml and reacted with the anti-B antibody (Immunocor Gamma, Norcross, GA) to demonstrate the typical mixed-field agglutination. The number of agglutination in a region of 1 mm × 1 mm × 0.1 mm was counted manually using haemocytometer under the microscope magnification of 100×.

### Statistical analysis

The data was analyzed using the SPSS 18 software (PASW statistics 18.0). The relative percentage of B antigen expression for the cells of B and B<sub>3</sub> were compared using the Student t-test. The numbers of aggregate with the indicated number of cells/aggregate were not normally distributed; therefore, the comparison between K562, K562-B and K562-B<sub>3</sub> was done using nonparametric Kruskal-Wallis one-way analysis of variance. The mean differences with p < 0.05 were considered statistically significant.

### Supporting Information

**Figure S1** A. The sequences for the cDNA clone skipping of exon 6. Note the direct link for the sequences of exon 5 to exon 7. B. The sequences for the cDNA clone skipping of exons 2 and 3. Note the direct link for the sequences of exon 1 to exon 4. C. The sequences for the cDNA clone skipping of exons 2, 3 and 6. Note the direct link for the sequences of exon 1 to exon 4, and exon 5 to exon 7. D. The sequences for the cDNA clone skipping of exons 2, 3, 4 and 6. Note the direct link for the sequences of exon 1 to exon 5 and exon 5 to exon 7. E. The sequences for the cDNA clone skipping of exons 2 to 6. Note the direct link for the sequences of exon 1 to exon 7. F. The sequences for the cDNA clone skipping of exons 2 and 3, and intron 6 insertion. Note the direct link for the sequences of exon 1 to exon 4 and the intron 6 insertion. (TIF)

**Figure S2** The B<sub>3</sub> transcript with exon 3 deletion. The sequences for the cDNA clone skipping of exon 3 were shown. (TIF)

### Acknowledgments

The excellent consulting assistance and sample resources from Mr. Chien-Ting Peng (Department of Laboratory Medicine, Chang-Gung Memorial Hospital, Taiwan) are gratefully acknowledged.

### Author Contributions

Conceived and designed the experiments: DPC CPT CFS. Performed the experiments: WTW. Analyzed the data: DPC CPT. Contributed reagents/materials/analysis tools: DPC CPT WTW. Wrote the paper: DPC CPT.

## References

- Landsteiner K (1900) Zur Kenntnis der antifermentativen, lytischen und agglutinierenden Wirkungen des Bluteserums und der Lymphe. *Zentralbl Bakteriol* 27: 352–362.
- Yamamoto F, Clausen H, White T, Marken J, Hakomori S (1990) Molecular genetic basis of the histo-blood group ABO system. *Nature* 345: 229–233.
- Yamamoto F, Marken J, Tsuji T, White T, Clausen H, et al. (1990) Cloning and characterization of DNA complementary to human UDP-GalNAc: Fuc alpha 1→2Gal alpha 1→3GalNAc transferase (histo-blood group A transferase) mRNA. *J Biol Chem* 265: 1146–1151.
- Yamamoto F, McNeill PD, Hakomori S (1995) Genomic organization of human histo-blood group ABO genes. *Glycobiology* 5: 51–58.
- Ogasawara K, Bannai M, Saitou N, Yabe R, Nakata K, et al. (1996) Extensive polymorphism of ABO blood group gene: three major lineages of the alleles for the common ABO phenotypes. *Hum Genet* 97: 777–783.
- Issitt PD, Anstee DJ (1998) *Applied blood group serology*. Durham, NC: Montgomery Scientific Publications.
- Chester MA, Olsson ML (2001) The ABO blood group gene. A locus of considerable genetic diversity. *Transfus Med Rev* 15: 177–200.
- Yip SP (2002) Sequence variation at the human ABO locus. *Ann Hum Genet* 66: 1–27.
- Ogasawara K, Yabe R, Uchikawa M, Saitou N, Bannai M, et al. (1996) Molecular genetic analysis of variant phenotypes of the ABO blood group system. *Blood* 88: 2732–2737.
- Sun CF, Chen DP, Lin KT, Wang WT, Wang YC, et al. (2003) Molecular genetic analysis of the B<sub>3</sub> phenotype. *Vox Sang* 85: 216–220.
- Sun CF, Yu LC, Chen DP, Chou DL, Twu YC, et al. (2003) Molecular genetic analysis for the A<sup>cl</sup> and A<sup>3</sup> alleles. *Transfusion* 43: 1138–1144.
- Chen DP, Tseng CP, Wang WT, Sun CF (2005) Identification of a novel A<sup>2</sup> allele derived from the A transferase gene through a nucleotide substitution G539C. *Vox Sang* 88: 196–199.
- Yamamoto F, McNeill PD, Yamamoto M, Hakomori S, Harris T, et al. (1993) Molecular genetic analysis of the ABO blood group system: I. Weak subgroups: A<sup>2</sup> and B<sup>3</sup> alleles. *Vox Sang* 64: 116–119.
- Ogasawara K, Yabe R, Uchikawa M, Nakata K, Watanabe J, et al. (2001) Recombination and gene conversion-like events may contribute to ABO gene diversity causing various phenotypes. *Immunogenetics* 53: 190–199.
- Yu LC, Twu YC, Chou ML, Chang CY, Wu CY, et al. (2002) Molecular genetic analysis for the B<sup>3</sup> allele. *Blood* 100: 1490–1492.
- Lin-Chu M, Broadberry RE, Chiou PW (1986) The B<sub>3</sub> phenotype in Chinese. *Transfusion* 26: 428–430.
- Zhu F, Xu X, Hong X, He J, Yan L (2008) A 425T>C mutation in the B allele for the ABO transferase is associated with the B<sub>3</sub> phenotype in Han Chinese persons. *Transfusion* 48: 2476–2477.
- Irshaid NM, Chester MA, Olsson ML (1999) Allele-related variation in minisatellite repeats involved in the transcription of the blood group ABO gene. *Transfus Med* 9: 219–226.
- Kominato Y, Tsuchiya T, Hata N, Takizawa H, Yamamoto F (1997) Transcription of human ABO histo-blood group genes is dependent upon binding of transcription factor CBF/NF-Y to minisatellite sequence. *J Biol Chem* 272: 25890–25898.
- Yu LC, Chang CY, Twu YC, Lin M (2000) Human histo-blood group ABO glycosyltransferase genes: different enhancer structures with different transcriptional activities. *Biochem Biophys Res Commun* 273: 459–466.
- Kominato Y, Hata Y, Takizawa H, Tsuchiya T, Tsukada J, et al. (1999) Expression of human histo-blood group ABO genes is dependent upon DNA methylation of the promoter region. *J Biol Chem* 274: 37240–37250.
- Chen DP, Tseng CP, Wang WT, Sun CF (2011) Use of cell study models to confirm the weak ABO phenotypes caused by point mutations among Taiwanese. *Ann Clin Lab Sci* 41: 346–352.
- Tsuji-Wakisaka K, Akao M, Ishii TM, Ashihara T, Makiyama T (2011) Identification and functional characterization of KCNQ1 mutations around the exon 7-intron 7 junction affecting the splicing process. *Biochimica et Biophysica Acta* 1812: 1452–1459. pp 1452–1459.
- Symoens S, Malfait F, Vlummens P, Hermans-Lê T, Syx D, et al. (2011) A novel splice variant in the N-propeptide of COL5A1 causes an EDS phenotype with severe kyphoscoliosis and eye involvement. *PLoS One* 6: e20121.
- Hou JW (2006) Atlantoaxial subluxation with recurrent consciousness disturbance in a boy with Lesch-Nyhan syndrome. *Clin Observ* 95: 1500–1504.
- Hwang DY, Hung CC, Riepe FG, Auchus RJ, Kulle AE, et al. (2011) CYP17A1 Intron mutation causing cryptic splicing in 17 $\alpha$ -hydroxylase deficiency. *PLoS One* 6: e25492.
- Seltsam A, Blasczyk R (2005) Missense mutations outside the catalytic domain of the ABO glycosyltransferase can cause weak blood group A and B phenotypes. *Transfusion*. 45: 1663–1669.
- Paulson JC, Colley KJ (1989) Glycosyltransferases. Structure, localization, and control of cell type-specific glycosylation. *J Biol Chem* 264: 17615–17618.
- Chester MA, Olsson ML (2001) The ABO blood group gene—a locus of considerable genetic diversity. *Transfus Med Rev* 15: 177–200.
- Olsson ML, Chester MA (2001) Polymorphism and recombination events at the ABO locus: a major challenge for genomic ABO blood grouping strategies. *Transfus Med* 11: 295–313.
- Olsson ML, Irshaid NM, Kuosmanen M, Pirkola M, Chester M (2000) A splice-site mutation defines the Afinn allele at the blood group ABO locus. *Transfusion* 40: 90S.
- Kominato Y, Hata Y, Takizawa H, Matsumoto K, Yasui K, et al. (2002) Alternative promoter identified between a hypermethylated upstream region of repetitive elements and a CpG island in human ABO histo-blood group genes. *J Biol Chem* 277: 37936–37948.
- Hata Y, Kominato Y, Yamamoto F, Takizawa H (2002) Characterization of the human ABO gene promoter in erythroid cell lineage. *Vox Sang* 82: 39–46.
